# Supplementary material
Source: publisher figshare collection journal article supplement (https://gsapubs.figshare.com/ndownloader/files/34172136)
Supplement: Supplementary file 1 [file 34172136]

## Sheet: Table S2
TABLE S2: Re AND Os ISOTOPIC COMPOSITION AND ELEMENTAL ABUNDANCE DATA FOR THE Andraum-3 CORE
Height difference	Age corrected for 5mm/ka	Age corrected for 10mm/ka	Sample height	Re (ng/g)	±	Os (pg/g)	±	192Os (pg/g)	±	187Re/188Os	±	187Os/188Os	±	Osi @ 494.9 Ma	Age corrected Osi at 5mm/ka	Age corrected Osi at 10mm/ka
-4.52	491.826	493.363	6.07	102.59	0.195554	4273.82	9.39141	1508.48	1.51381	135.297	0.291167	1.42808	0.00212502	0.307427	0.314932	0.311439
-3.57	492.73	493.815	7.02	75.5086	0.143615	1717.55	6.74174	504.764	0.866987	297.599	0.761974	3.23055	0.00857489	0.764602	0.77754	0.772116
-2.61	493.444	494.172	7.98	104.794	0.199706	2306.14	7.51879	677.023	0.809798	307.933	0.692119	3.24201	0.00600075	0.689445	0.700132	0.696366
-2.2	493.966	494.433	8.39	20.463	0.0394859	572.766	2.27139	173.486	0.318018	234.653	0.622988	2.91033	0.00838487	0.964882	0.971291	0.969451
-1.61	494.406	494.653	8.98	53.2049	0.102054	810.046	3.54074	199.29	0.338249	531.115	1.35734	5.32584	0.0132883	0.921445	0.933079	0.930875
-0.63	494.728	494.814	9.96	30.9983	0.0757204	1217.17	4.0486	408.695	0.74867	150.89	0.46038	1.88701	0.00511857	0.635218	0.638204	0.637986
-0.23	494.854	494.877	10.36	37.6977	0.0763222	1416.46	4.12874	461.577	0.621293	162.477	0.394407	2.17361	0.004161	0.82548	0.828569	0.828506
0	494.9	494.9	10.59	16.86	0.0345054	690.624	2.20574	227.967	0.37428	147.132	0.385064	2.04937	0.00486494	0.828452	0.83125	0.83125
0.41	494.982	494.941	11	11.2949	0.0225923	616.956	1.61673	211.197	0.272181	106.395	0.25257	1.70675	0.00313549	0.823724	0.825747	0.82582
1.41	495.264	495.082	12	19.0361	0.0427594	916.824	2.80232	318.232	0.53549	119.003	0.33365	1.57937	0.00412828	0.591299	0.593398	0.593762
2.5	495.764	495.332	13.09	7.74692	0.0169264	466.76	1.27964	160.06	0.224272	96.2874	0.249188	1.69065	0.00341119	0.890836	0.892079	0.892777
3.41	496.446	495.673	14	54.1789	0.104034	809.212	4.07874	195.27	0.420039	551.972	1.58873	5.57717	0.0178647	0.990503	0.992988	1.00016
4.39	497.324	496.112	14.98	19.473	0.0387134	759.926	2.1848	244.433	0.301476	158.488	0.37005	2.30084	0.00413356	0.983346	0.982243	0.98547
5.44	498.412	496.656	16.03	23.2792	0.0446747	762.65	2.13981	239.978	0.279086	192.983	0.432077	2.51943	0.00406715	0.914505	0.910316	0.916009
6.87	499.786	497.343	17.46	28.0052	0.0667164	834.764	4.36004	263.034	0.877749	211.812	0.867933	2.5055	0.0132775	0.74297	0.734501	0.743194
8.65	501.516	498.208	19.24	50.1953	0.11389	935.603	3.2094	259.259	0.334718	385.17	1.00398	3.88285	0.00715221	0.675461	0.65117	0.672575

## Sheet: G49833
Rooney, A.D., Milikin, A.E.G., and Ahlberg, P., 2022, Re-Os geochronology for the Cambrian SPICE event: Insights into euxinia and enhanced continental weathering from radiogenic isotopes: Geology, v. 50, https://doi.org/10.1130/G49833.1
